# 1 Network hubs in root-associated fungal 2 metacommunities

3  
4 Hirokazu Toju<sup>1,2\*</sup>, Akifumi S. Tanabe<sup>3</sup>, Hirotohi Sato<sup>4</sup>

5  
6 \*Correspondence: [toju.hirokazu.4c@kyoto-u.ac.jp](mailto:toju.hirokazu.4c@kyoto-u.ac.jp)

7 <sup>1</sup>Center for Ecological Research, Kyoto University, Otsu, Shiga 520-2113, Japan

8 <sup>2</sup>Precursory Research for Embryonic Science and Technology (PRESTO), Japan Science and  
9 Technology Agency, Kawaguchi, Saitama 332-0012, Japan

10 <sup>3</sup>Faculty of Science and Technology, Ryukoku University, 1-5 Yokotani, Seta Oe-cho, Otsu,  
11 Shiga 520-2194, Japan

12 <sup>4</sup>Graduate School of Human and Environmental Studies, Kyoto University, Sakyo, Kyoto  
13 606-8501, Japan

14

15 bioRxiv accession: <https://doi.org/10.1101/270371>

16

17 This article includes 5 Figures, 1 Table, and 9 additional files.

18

## 19 **Abstract**

20 **Background:** Although a number of recent studies have uncovered remarkable diversity of  
21 microbes associated with plants, understanding and managing dynamics of plant microbiomes  
22 remain major scientific challenges. In this respect, network analytical methods have provided  
23 a basis for exploring “hub” microbial species, which potentially organize community-scale  
24 processes of plant–microbe interactions.

25 **Methods:** By compiling Illumina sequencing data of root-associated fungi in eight forest  
26 ecosystems across the Japanese Archipelago, we explored hubs within “metacommunity-scale”  
27 networks of plant–fungus associations. In total, the metadata included 8,080 fungal  
28 operational taxonomic units (OTUs) detected from 227 local populations of 150 plant  
29 species/taxa.

30 **Results:** Few fungal OTUs were common across all the eight forests. However, in each  
31 metacommunity-scale network representing northern four localities or southern four localities,  
32 diverse mycorrhizal, endophytic, and pathogenic fungi were classified as “metacommunity  
33 hubs”, which were detected from diverse host plant taxa throughout a climatic region.  
34 Specifically, *Mortierella* (Mortierellales), *Cladophialophora* (Chaetothyriales), *Ilyonectria*  
35 (Hypocreales), *Pezicula* (Helotiales), and *Cadophora* (incertae sedis) had broad geographic  
36 and host ranges across the northern (cool-temperate) region, while *Saitozyma/Cryptococcus*  
37 (Tremellales/Trichosporonales) and *Mortierella* as well as some arbuscular mycorrhizal fungi  
38 were placed at the central positions of the metacommunity-scale network representing  
39 warm-temperate and subtropical forests in southern Japan.

40 **Conclusions:** The network theoretical framework presented in this study will help us explore  
41 prospective fungi and bacteria, which have high potentials for agricultural application to  
42 diverse plant species within each climatic region. As some of those fungal taxa with broad  
43 geographic and host ranges have been known to increase the growth and pathogen resistance  
44 of host plants, further studies elucidating their functional roles are awaited.

45 **Keywords:** agriculture; biodiversity; ecosystem restoration; host specificity or preference;  
46 latitudinal gradients; metacommunities; microbial inoculation; network hubs; plant–fungus

47 interactions; mycorrhizal and endophytic symbiosis.

48

## 49 **Background**

50 Below-ground fungi in the endosphere and rhizosphere are key drivers of terrestrial  
51 ecosystem processes [1-4]. Mycorrhizal fungi, for example, are important partners of most  
52 land plant species, enhancing nutritional conditions and pathogen resistance of host plants  
53 [5-7]. In reward for the essential physiological services, they receive ca. 20% of net  
54 photosynthetic products from plants [8, 9]. Recent studies have also indicated that diverse  
55 taxonomic groups of endophytic fungi (e.g., endophytic fungi in the ascomycete orders  
56 Helotiales and Chaetothyriales) commonly interact with plant roots, providing soil  
57 nitrogen/phosphorous to their hosts [10-14], converting organic nitrogen into inorganic forms  
58 in the rhizosphere [15], and increasing plants' resistance to environmental stresses [16-18].  
59 Because of their fundamental roles, below-ground fungi have been considered as prospective  
60 sources of ecosystem-level functioning in forest management, agriculture, and ecosystem  
61 restoration [17-20]. However, due to the exceptional diversity of below-ground fungi [21-23]  
62 and the extraordinary complexity of below-ground plant–fungus interactions [24-26], we are  
63 still at an early stage of managing and manipulating plant-associated microbiomes [27-29].

64 In disentangling complex webs of below-ground plant–fungus associations, network  
65 analyses, which have been originally applied to human relations and the World-Wide Web  
66 [30, 31], provide crucial insights. By using network analytical tools, we can infer how plant  
67 species in a forest, grassland, or farmland are associated with diverse taxonomic and  
68 functional groups of fungi [24, 32-34]. Such information of network structure (topology) can  
69 be used to identify “hub” species, which are placed at the center of a network depicting  
70 multispecies host–symbiont associations [35] (cf. [34, 36, 37]). Those hubs with broad  
71 host/symbiont ranges are expected to play key roles by mediating otherwise discrete  
72 ecological processes within a community [19, 24]. For example, although arbuscular  
73 mycorrhizal and ectomycorrhizal symbioses have been considered to involve distinct sets of  
74 plant and fungal lineages [38] (but see [39, 40]), hub endophytic fungi with broad host ranges  
75 may mediate indirect interactions between arbuscular mycorrhizal and ectomycorrhizal plant  
76 species through below-ground mycelial connections. As information of plant-associated  
77 fungal communities is now easily available with high-throughput DNA sequencing

78 technologies [1, 21, 22], finding hub microbial species out of hundreds or thousands of  
79 species within a network has become an important basis for understanding and predicting  
80 ecosystem-scale phenomena.

81         Nonetheless, given that fungi can disperse long distances with spores, conidia, and  
82 propagules [41-44], information of local-scale networks alone does not provide thorough  
83 insights into below-ground plant–fungus interactions in the wild. In other words, no forests,  
84 grasslands, and farmlands are free from perturbations caused by fungi immigrating from other  
85 localities [45-49]. Therefore, to consider how local ecosystem processes are interlinked by  
86 dispersal of fungi, we need to take into account “metacommunity-scale” networks of plant–  
87 fungus associations [35]. Within a dataset of multiple local communities (e.g., [25]), fungal  
88 species that occur in multiple localities may interlink local networks of plant–fungus  
89 associations. Among them, some species that not only have broad geographic ranges but also  
90 are associated with diverse host plant species would be placed at the core positions of a  
91 metacommunity-scale network [35]. Such “metacommunity hub” fungi would be major  
92 drivers of the synchronization and restructuring of local ecosystem processes (*sensu* [50]),  
93 and hence their functional roles need to be investigated with priority [35]. Moreover, in the  
94 screening of mycorrhizal and endophytic fungi that can be used in agriculture and ecosystem  
95 restoration programs [17, 20, 51], analytical pipelines for identifying metacommunity hubs  
96 will help us explore species that are potentially applied (inoculated) to diverse plant species  
97 over broad geographic ranges of farmlands, forests, or grasslands. Nonetheless, despite the  
98 potential importance of metacommunity hubs in both basic and applied microbiology, few  
99 studies have examined metacommunity-level networks of plant–symbiont associations.

100         By compiling Illumina sequencing datasets of root-associated fungi [52], we herein  
101 inferred a metacommunity-level network of below-ground plant–fungus associations and  
102 thereby explored metacommunity hubs. Our metadata consisted of plant–fungus association  
103 data in eight forest localities across the entire range of the Japanese Archipelago, including  
104 150 plant species/taxa and 8,080 fungal operational taxonomic units (OTUs) in temperate and  
105 subtropical regions. Based on the information of local- and metacommunity-level networks,  
106 each of the fungal OTUs was evaluated in light of its topological positions. We then

107 examined whether fungal OTUs placed at the core of local-level plant–fungus networks could  
108 play key topological roles within the metacommunity-level network. Overall, this study  
109 uncover how diverse taxonomic groups of mycorrhizal and endophytic fungi can form  
110 metacommunity-scale networks of below-ground plant–fungus associations, providing a basis  
111 for analyzing complex spatial processes of species-rich host–microbe systems.

112

## 113 **Methods**

### 114 **Terminology**

115 While a single type of plant–fungus interactions is targeted in each of most mycological  
116 studies (e.g., arbuscular mycorrhizal symbiosis or ectomycorrhizal symbiosis), we herein  
117 analyze the metadata including multiple categories of below-ground plant–fungus  
118 associations [52]. Because arbuscular mycorrhizal, ectomycorrhizal, and endophytic fungi, for  
119 example, vary in their microscopic structure within plant tissue [38], it is impossible to  
120 develop a general criterion of mutualistic/antagonistic interactions for all those fungal  
121 functional groups. Therefore, we used the phrase “associations” instead of “interactions”  
122 throughout the manuscript when we discuss patterns detected based on the Illumina  
123 sequencing metadata of root-associated fungi. Consequently, our results represented not only  
124 mutualistic or antagonistic interactions but also neutral or commensalistic interactions [24, 53,  
125 54]. Our aim in this study is to gain an overview of the metacommunity-scale plant–fungus  
126 associations, while the nature of respective plant–fungus associations should be evaluated in  
127 future inoculation experiments.

128

### 129 **Data**

130 We compiled the Illumina (MiSeq) sequencing data collected in a previous study [52], in  
131 which community-scale statistical properties of below-ground plant–fungus associations were  
132 compared among eight forest localities (four cool-temperate, one warm-temperate, and three  
133 subtropical forests) across the entire range of the Japanese Archipelago (45.042–24.407 °N;

134 Fig. 1) (DDBJ Sequence Read Archives accession: DRA006339). In each forest, 2-cm  
135 segment of terminal roots were sampled from 3-cm below the soil surface at 1-m horizontal  
136 intervals [52]. Those root samples were collected irrespective of their morphology and  
137 mycorrhizal type: hence, the samples as a whole represented below-ground relative  
138 abundance of plant species in each forest community. Based on the sequences of the genes  
139 encoding the large subunit of ribulose-1,5-bisphosphate carboxylase (*rbcL*) and the internal  
140 transcribed spacer 1 (ITS1) of the ribosomal RNA region, host plant species were identified,  
141 although there were plant root samples that could not be identified to species with the *rbcL*  
142 and ITS1 regions [52].

143 The Illumina sequencing reads of the fungal ITS1 region were processed as detailed in  
144 the data-source study [52]. The primers used were designed to target not only Ascomycota  
145 and Basidiomycota but also diverse non-Dikarya (e.g., Glomeromycota) taxa [55]. In most  
146 studies analyzing community structure of Ascomycota and Basidiomycota fungi, OTUs of the  
147 ITS region are defined with a cut-off sequence similarity of 97% [22, 56, 57] (see also [58]).  
148 Meanwhile, Glomeromycota fungi generally have much higher intraspecific ITS-sequence  
149 variation than other taxonomic groups of fungi [59]. Consequently, we used 97% and 94%  
150 cut-off sequence similarities for defining non-Glomeromycota and Glomeromycota fungal  
151 OTUs, respectively [52]. The OTUs were then subjected to reference database search with the  
152 query-centric auto-*k*-nearest-neighbor algorithm [60, 61] and subsequent taxonomic  
153 assignment with the lowest common ancestor algorithm [62]. Based on the inferred taxonomy,  
154 the functional group of each fungal OTU was inferred using the program FUNGuild 1.0 [63].

155 After a series of bioinformatics and rarefaction procedures, 1,000 fungal ITS reads were  
156 obtained from each of the 240 samples collected in each forest locality (i.e., 1,000 reads × 240  
157 samples × 8 sites). A sample (row) × fungal OTU (column) data matrix, in which a cell entry  
158 depicted the number of sequencing reads of an OTU in a sample, was obtained for each local  
159 forest (“sample-level” matrix) (Additional file 1: Data S1). Each local sample-level matrix  
160 was then converted into a “species-level” matrix, in which a cell entry represented the number  
161 of root samples from which associations of a plant species/taxa (row) and a fungal OTU  
162 (columns) was observed: 17–55 plant species/taxa and 1,149–1,797 fungal OTUs were

163 detected from the local species-level matrices (Additional file 2: Data S2). In total, the  
164 matrices included 150 plant species/taxa and 8,080 fungal OTUs (Additional file 3: Data S3).

165

## 166 **Local networks**

167 Among the eight forest localities, variation in the order-level taxonomic compositions were  
168 examined with the permutational analysis of variance (PERMANOVA; [64]) and the  
169 permutational analysis for the multivariate homogeneity of dispersions (PERMDISP; [65])  
170 with the “adonis” and “betadisper” functions of the vegan 2.4-3 package [66] of R 3.4.1 [67],  
171 respectively. The  $\beta$ -diversity values used in the PERMANOVA and PERMDISP analyses  
172 were calculated with the “Bray-Curtis” metric based on the sample-level matrices (Additional  
173 file 1: Data S1). Note that the “Raup-Crick”  $\beta$ -diversity metric [68], which controls  
174  $\alpha$ -diversity in community data but requires computationally intensive randomization, was not  
175 applicable to our large metadata. Geographic variation in the compositions of fungal  
176 functional groups was also evaluated by PERMANOVA and PERMDISP analyses.

177 For each of the eight local forests, the network structure of below-ground plant–fungus  
178 associations was visualized based on the species-level matrix (Additional file 2: Data S2)  
179 using the program Gephi 0.9.1 [69] with the “ForceAtlas2” layout algorithm [70]. Within the  
180 networks, the order-level taxonomy of fungal OTUs was highlighted.

181 To evaluate host ranges of each fungal OTU in each local forest, we first calculated the  $d'$   
182 metric of interaction specificity [71]. However, estimates of the  $d'$  metric varied considerably  
183 among fungal OTUs observed from small numbers of root samples (Additional file 4; Figure  
184 S1) presumably due to overestimation or underestimation of host preferences for those rare  
185 OTUs. Therefore, we scored each fungal OTU based on their topological positions within  
186 each local network by calculating network centrality indices (degree, closeness, betweenness,  
187 and eigenvector centralities metrics of network centrality; [31]). Among the centrality metrics,  
188 betweenness centrality, which measures the extent to which a given nodes (species) is located  
189 within the shortest paths connecting pairs of other nodes in a network [72], is often used to  
190 explore organisms with broad host or partner ranges [35]. Thus, in each local network, fungal



191 OTUs were ranked based on their betweenness centrality scores (local betweenness).

192

### 193 **Metacommunity-scale network**

194 By compiling the species-level matrices of the eight local forests, the topology of the  
195 metacommunity-scale network of plant–fungus associations was inferred. In general, species  
196 interaction (association) networks of local communities can be interconnected by species that  
197 appear in two or more local networks, thereby merged into a metacommunity-scale network  
198 [35]. In our data across the eight local forests, 2,109 OTUs out of the 8,080 fungal OTUs  
199 appeared in two or more localities. Therefore, we could infer the topology of a  
200 metacommunity-scale network, in which the eight local networks were combined by the  
201 2,109 fungal OTUs. In the metacommunity-scale network, plant species/taxa observed in  
202 different localities were treated as different network nodes because our purpose in this study  
203 was to explore fungi that potentially play key roles in synchronizing local ecosystem  
204 processes [35]. In total, 227 plant nodes representing local populations of 150 plant  
205 species/taxa were included in the metacommunity-scale network.

206 We then screened for fungal OTUs with broad geographic and host ranges based on the  
207 betweenness centrality scores of respective fungal OTUs within the metacommunity network  
208 (metacommunity betweenness,  $B_{\text{meta}}$ ). In general, species with highest metacommunity  
209 betweenness scores not only occur in local communities over broad biotic/abiotic  
210 environmental conditions but also are associated with broad ranges of host/partner species  
211 [35]. Possible relationship between local- and metacommunity-scale topological roles was  
212 then examined by plotting local and metacommunity betweenness scores ( $B_{\text{local}}$  and  $B_{\text{meta}}$ ) of  
213 each fungal OTUs on a two-dimensional surface. To make the betweenness scores vary from  
214 0 to 1, betweenness centrality of a fungal OTU  $i$  was standardized in each of the local- and  
215 metacommunity-scale networks as follows:

$$216 \quad B'_{\text{local}, i} = \frac{B_{\text{local}, i} - \min(B_{\text{local}})}{\max(B_{\text{local}}) - \min(B_{\text{local}})} \quad \text{and} \quad B'_{\text{meta}, i} = \frac{B_{\text{meta}, i} - \min(B_{\text{meta}})}{\max(B_{\text{meta}}) - \min(B_{\text{meta}})},$$

217 where  $B_{\text{local},i}$  and  $B_{\text{meta},i}$  were raw estimates of local- and metacommunity-scale  
218 betweenness of a fungal OTU  $i$ , and  $\min()$  and  $\max()$  indicated minimum and maximum  
219 values, respectively. For local betweenness of each OTU, a mean value across local networks  
220 was subsequently calculated ( $\bar{B}'_{\text{local},i}$ ): the local communities from which a target OTU was  
221 absent was omitted in the calculation of mean local betweenness. On the two-dimensional  
222 surface, the OTUs were then classified into four categories: metacommunity hubs having high  
223 betweenness in both local- and metacommunity-scale networks ( $\bar{B}'_{\text{local},i} \geq 0.5$ ;  $B'_{\text{meta},i} \geq$   
224  $0.5$ ), metacommunity connectors that had broad geographic ranges but displayed low local  
225 betweenness ( $\bar{B}'_{\text{local},i} < 0.5$ ;  $B'_{\text{meta},i} \geq 0.5$ ), local hubs that had high betweenness in local  
226 networks but not in the metacommunity-scale network ( $\bar{B}'_{\text{local},i} \geq 0.5$ ;  $B'_{\text{meta},i} < 0.5$ ), and  
227 peripherals with low betweenness at both local and metacommunity levels ( $\bar{B}'_{\text{local},i} < 0.5$ ;  
228  $B'_{\text{meta},i} < 0.5$ ) [35]. Approximately, 1–2% of fungal OTUs show betweenness scores higher  
229 than 0.5 in each local or metacommunity network, while the threshold value can be changed  
230 depending on the purpose of each study [35].

231 In addition to metacommunity hubs within the metacommunity-scale network  
232 representing all the eight localities, those within the metacommunity-scale network  
233 representing northern (sites 1–4) or southern (sites 5–8) four localities were also explored.  
234 This additional analysis allowed us to screen for fungal OTUs that potentially adapted to  
235 broad ranges of biotic and abiotic environments within northern (cool-temperate) or southern  
236 (warm-temperate or subtropical) part of Japan.

237

## 238 **Results**

### 239 **Local networks**

240 Among the eight forest localities, order-level taxonomic compositions of fungi varied  
241 significantly (PERMANOVA;  $F_{\text{model}} = 35.7$ ,  $P < 0.001$ ), while the differentiation of  
242 community structure was attributed at least partly to geographic variation in among-sample  
243 dispersion (PERMDISP;  $F = 13.2$ ,  $P < 0.001$ ) (Fig. 2a). Compositions of fungal functional  
244 groups were also differentiated among the eight localities (PERMANOVA;  $F_{\text{model}} = 34.9$ ,  $P <$

245 0.001), while within-site dispersion was significantly varied geographically (PERMDISP;  $F =$   
246 9.2,  $P < 0.001$ ) (Fig. 2b). The proportion of ectomycorrhizal fungal orders, such as Russulales,  
247 Thelephorales, and Sebaciniales, was higher in temperate forests than in subtropical forests,  
248 while that of arbuscular mycorrhizal fungi increased in subtropical localities (Fig. 2). The  
249 proportion of the ascomycete order Helotiales, which has been known to include not only  
250 ectomycorrhizal but also endophytic, saprotrophic, and ericoid mycorrhizal fungi [73], was  
251 higher in northern localities. In contrast, Diaporthales, which has been considered as  
252 predominantly plant pathogenic taxon [74] (but see [75]), was common in subtropical forests  
253 but not in others.

254 In each of the eight local networks depicting plant–fungus associations, some fungal  
255 OTUs were located at the central positions of the network, while others are distributed at  
256 peripheral positions (Additional file 5; Figure S2). Specifically, fungal OTUs belonging to the  
257 ascomycete orders Chaetothyriales (e.g., *Cladophialophora* and *Exophiala*) and Helotiales  
258 (e.g., *Rhizoderma*, *Pezicula*, *Rhizoscyphus*, and *Leptodontidium*) as well as some *Mortierella*  
259 OTUs had high betweenness centrality scores in each of the cool-temperate forests (Fig. 3a-b).  
260 In contrast, arbuscular mycorrhizal fungi (Glomeromycota) were common among OTUs with  
261 highest betweenness scores in subtropical forests (Fig. 3a-c). Some fungi in the ascomycete  
262 order Hypocreales (e.g., *Trichoderma*, *Ilyonectria*, *Simplicillium*, and *Calonectria*) also had  
263 high betweenness scores in some temperate and subtropical forests (Fig. 3b).

264

### 265 **Metacommunity-scale network**

266 In the metacommunity-scale network representing the connections among the eight local  
267 networks, not only arbuscular mycorrhizal but also saprotrophic/endophytic fungi were placed  
268 at the central topological positions (Fig. 4; Additional file 6; Figure S3). Among  
269 non-Glomeromycota OTUs, *Mortierella* (Mortierellales), *Cryptococcus* (Trichosporonales;  
270 the Blast top-hit fungus in the NCBI database was recently moved to *Saitozyma*  
271 (Tremellales); [76]), *Malassezia* (Malasseziales), *Oidiodendron* (incertae sedis), *Trichoderma*  
272 (Hypocreales), and a fungus distantly allied to *Melanconiella* (Diaporthales) displayed highest

273 metacommunity betweenness (Table 1). Among the OTUs with high metacommunity  
274 betweenness, only a *Mortierella* OTU was designated as a metacommunity hub (i.e.,  $\bar{B}'_{\text{local},i}$   
275  $\geq 0.5$ ;  $B'_{\text{meta},i} \geq 0.5$ ) and others had low betweenness scores at the local community level  
276 ( $\bar{B}'_{\text{local},i} < 0.5$ ; Fig. 5a).

277 In the metacommunity-scale network representing the four cool-temperate forests (sites  
278 1–4), many saprotrophic/endophytic fungal OTUs were associated with diverse plant  
279 species/taxa, located at the central topological positions within the network topology  
280 (Additional file 7; Figure S4; Fig. 5b). The list of these fungi with high metacommunity  
281 betweenness involved OTUs in the genera *Mortierella*, *Cladophialophora* (Chaetothyriales),  
282 *Pezicula* (Helotiales), and *Oidiodendron* as well as OTUs allied to *Ilyonectria protearum*  
283 (Nectriales) and *Cadophora orchidicola* (Helotiales) (Table 1). Most of those fungal OTUs  
284 also had high metacommunity betweenness, designated as metacommunity hubs (Fig. 5b).

285 In the metacommunity-scale network consisting of the warm-temperate and subtropical  
286 forests (sites 5–8), arbuscular mycorrhizal and saprotrophic/endophytic fungi were placed at  
287 the hub positions (Additional file 8; Figure S5; Fig. 5c). The list of non-Glomeromycota  
288 OTUs with highest metacommunity betweenness included *Saitozyma* (*Cryptococcus*),  
289 *Mortierella*, *Trichoderma*, and *Tomentella* as well as OTUs allied to *Cladophialophora*,  
290 *Scleropezicula* (Helotiales), *Melanconiella* (Diaporthales), and *Rhexodenticula* (incertae  
291 sedis) (Table 1). Among the taxa, *Saitozyma* and *Mortierella* included OTUs classified as  
292 metacommunity hubs (Fig. 5c; Table 1). In an additional analysis of a metacommunity-scale  
293 network including only the three subtropical forests (sites 6–8), similar sets of fungal taxa  
294 were highlighted (Additional file 9; Table S1). The detailed information of the network index  
295 scores examined in this study is provided in Data S3 (Additional file 3: Data S3).

296

## 297 Discussion

298 Based on the metadata of root-associated fungi across the Japanese Archipelago, we herein  
299 inferred the structure of a network representing metacommunity-scale associations of 150  
300 plant species/taxa and 8,080 fungal OTUs. Our analysis targeted diverse functional groups of

301 fungi such as arbuscular mycorrhizal, ectomycorrhizal, ericoid-mycorrhizal,  
302 saprotrophic/endophytic, and pathogenic fungi, which have been analyzed separately in most  
303 previous studies on plant–fungus networks. The comprehensive analysis of below-ground  
304 plant–fungus associations allowed us to explore metacommunity hub fungi, which not only  
305 occurred over broad geographic ranges but also had broad host ranges in respective local  
306 communities. Consequently, this study highlights several taxonomic groups of fungi  
307 potentially playing key roles in synchronizing metacommunity-scale processes of temperate  
308 and/or subtropical forests.

309 In the metacommunity-scale network representing all the eight local forests (Fig. 4),  
310 fungi in several saprotrophic or endophytic taxa showed higher betweenness centrality scores  
311 than other fungi (Table 1). *Mortierella* is generally considered as a saprotrophic lineage [77]  
312 but it also includes fungi contributing to the growth and pathogen resistance of plants [78-80].  
313 A phosphate solubilizing strain of *Mortierella*, for example, increases shoot and root growth  
314 of host plants under salt stress, especially when co-inoculated with an arbuscular mycorrhizal  
315 fungus [78]. In addition, polyunsaturated fatty acids produced by some *Mortierella* species  
316 are known to increase resistance of plants against phytopathogens [79, 80]. Fungi in the genus  
317 *Trichoderma* are commonly detected and isolated from the rhizosphere [77, 81]. Many of  
318 them inhibit the growth of other fungi, often used in the biological control of phytopathogens  
319 [82-84]. Some of them are also reported to suppress root-knot nematodes [85] or to promote  
320 root growth [86]. The analysis also highlighted basidiomycete yeasts in the genus *Saitozyma*  
321 or *Cryptococcus* (teleomorph = *Filobasidiella*), which are often isolated from soil [22, 87] as  
322 well as both above-ground and below-ground parts of plants [88-91].

323 Along with those possibly saprotrophic or endophytic taxa, ericoid mycorrhizal and  
324 phytopathogenic taxa of fungi displayed relatively high betweenness scores within the  
325 metacommunity-scale network representing all the eight local forests (Table 1). Specifically,  
326 *Oidiodendron* (teleomorph = *Myxotrichum*) is a taxon represented by possibly ericoid  
327 mycorrhizal species (*O. maius* and *O. griseum*) [92, 93], although fungi in the genus are found  
328 also from roots of non-ericaceous plants and soil [94]. On the other hand, fungi in the family  
329 Nectriaceae are known to cause black foot disease [95], often having serious damage on

330 economically important woody plants [96, 97]. Although we collected seemingly benign roots  
331 in the study forests, some samples may be damaged by those pathogens. Alternatively, some  
332 lineages of Nectriaceae fungi may be associated with plant hosts non-symptomatically,  
333 having adverse effects context-dependently.

334 Although these fungi were candidates of metacommunity hubs, which are characterized  
335 by broad geographic ranges and host plant ranges, none except but a *Mortierella* OTU had  
336 high betweenness scores at both local and metacommunity levels (Fig. 5a). This result  
337 suggests that even if some fungi have broad geographic ranges across the Japanese  
338 Archipelago, few played important topological roles in each of the local networks  
339 representing plant–fungus associations. In other words, fungi that can adapt to biotic and  
340 abiotic environments in forest ecosystems throughout cool-temperate, warm-temperate, and  
341 subtropical regions are rare.

342 Therefore, we also explored fungi with broad geographic and host ranges within the  
343 metacommunities representing northern (cool-temperate) and southern (warm-temperate and  
344 subtropical) regions of Japan. In the metacommunity consisting of the four cool-temperate  
345 forests (Additional file 7; Figure S4), fungal OTUs in the genera *Mortierella*,  
346 *Cladophialophora*, and *Pezicula* as well as those allied to *Ilyonectria* and *Cadophora* had  
347 highest betweenness at both local and metacommunity levels, classified as metacommunity  
348 hubs (Fig. 5b; Table 1). Among them, *Cladophialophora* is of particular interest because it  
349 has been known as a lineage of “dark septate endophytes” [98-100] (*sensu* [14, 15, 101]). A  
350 species within the genus, *C. chaetospora* (= *Heteroconium chaetospora*), to which  
351 high-betweenness OTUs in our data were closely allied, has been known not only to provide  
352 nitrogen to host plants but also to suppress pathogens [12, 16, 102]. Likewise, the Helotiales  
353 genus *Pezicula* (anamorph = *Cryptosporiopsis*) includes endophytic fungi [103-105], some of  
354 which produce secondary metabolites suppressing other microbes in the rhizosphere [106,  
355 107]. Our finding that some of *Cladophialophora* and *Pezicula* fungi could be associated with  
356 various taxonomic groups of plants over broad geographic ranges highlights potentially  
357 important physiological and ecological roles of those endophytes at the community and  
358 metacommunity levels.

359 In the southern metacommunity networks consisting of warm-temperate and subtropical  
360 forests (Additional file 8; Figure S5), some arbuscular mycorrhizal OTUs and *Saitozyma*  
361 (*Cryptococcus*) and *Mortierella* OTUs had high betweenness scores at both local and  
362 metacommunity levels, designated as metacommunity hubs (Fig. 5c; Table 1). Given the  
363 above-mentioned prevalence of fungal OTUs allied to *Cladophialophora chaetospora* in the  
364 cool-temperate metacommunity, the contrasting list of metacommunity hubs in the southern  
365 (warm-temperate–subtropical) metacommunity implies that different taxonomic and  
366 functional groups of fungi play major metacommunity-scale roles in different climatic regions.  
367 This working hypothesis is partially supported by previous studies indicating endemism and  
368 vicariance in the biogeography of fungi and bacteria [108, 109], promoting conceptual  
369 advances beyond the classic belief that every microbe is everywhere but the environment  
370 selects microbes colonizing respective local communities [110].

371 The roles of those metacommunity hubs detected in this study are of particular interest  
372 from the aspect of theoretical ecology. Hub species connected to many other species in an  
373 ecosystem often integrate “energy channels” [111] within species interaction networks,  
374 having great impacts on biodiversity and productivity of the ecosystems [35]. The concept of  
375 “keystone” or “foundation” species [112, 113] can be extended to the metacommunity level,  
376 thereby promoting studies exploring species that restructure and synchronize ecological (and  
377 evolutionary) dynamics over broad geographic ranges [35]. Given that below-ground plant–  
378 fungus symbioses are key components of the terrestrial biosphere [1, 2], identifying fungal  
379 species that potentially have great impacts on the metacommunity-scale processes of such  
380 below-ground interactions will provide crucial insights into the conservation and restoration  
381 of forests and grasslands. We here showed that the list of metacommunity hubs could involve  
382 various lineages of endophytic fungi, whose ecosystem-scale functions have been  
383 underappreciated compared to those of mycorrhizal fungi. As those endophytic fungi are  
384 potentially used as inoculants when we reintroduce plant seedlings in ecosystem restoration  
385 programs [20, 51], exploring fungi with highest potentials in each climatic/biogeographic  
386 region will be a promising direction of research in conservation biology.

387 The finding that compositions of metacommunity hubs could vary depending on climatic

388 regions also gives key implications for the application of endophytes in agriculture. Although  
389 a number of studies have tried to use endophytic fungi and/or bacteria as microbial inoculants  
390 in agriculture [17, 18, 114], such microbes introduced to agroecosystems are often  
391 outcompeted and replaced by indigenous (resident) microbes [115, 116]. Moreover, even if an  
392 endophytic species or strain increases plant growth in pot experiments under controlled  
393 environmental conditions, its effects in the field often vary considerably depending on biotic  
394 and abiotic contexts of local agroecosystems [17] (see also [117]). Therefore, in the screening  
395 of endophytes that can be used in broad ranges of biotic and abiotic environmental conditions,  
396 the metacommunity-scale network analysis outlined in this study will help us find promising  
397 candidates out of thousands or tens of thousands microbial species in the wild. Consequently,  
398 to find promising microbes whose inocula can persist in agroecosystems for long time periods,  
399 exploration of metacommunity hubs needs to be performed in respective climatic or  
400 biogeographic regions.

401 For more advanced applications in conservation biology and agriculture, continual  
402 improvements of methods for analyzing metacommunity-scale networks are necessary. First,  
403 while the fungal OTUs in our network analysis was defined based on the cut-off sequence  
404 similarities used in other studies targeting “species-level” diversity of fungi [57, 59],  
405 physiological functions can vary greatly within fungal species or species groups [14, 118].  
406 Given that bioinformatic tools that potentially help us detect single-nucleotide-level variation  
407 are becoming available [119], the resolution of network analyses may be greatly improved in  
408 the near future. Second, although some computer programs allow us to infer functions of  
409 respective microbial OTUs within network data [63, 120], the database information of  
410 microbial functions remains scarce. To increase the coverage and accuracy of automatic  
411 annotations of microbial functions, studies describing the physiology, ecology, and genomes  
412 of microbes should be accelerated. With improved reference databases, more insights into the  
413 metacommunity-scale organization of plant–fungus associations will be obtained by  
414 reanalyzing the network data by compiling enhanced information of fungal functional groups.  
415 Third, as the diversity and compositions of plant–fungus associations included in a network  
416 can depend on how we process raw samples, special care is required in the selection of



417 methods for washing and preparing root (or soil) samples. By sterilizing root samples with  
418 NaClO [121], for example, we may be able to exclude fungi or bacteria that are merely  
419 adhering to root surfaces. Meanwhile, some of those fungi and bacteria on root surfaces may  
420 play pivotal physiological roles in the growth and survival of plants [122]. Accordingly, it  
421 would be productive to compare network topologies of plant–microbe associations among  
422 different source materials by partitioning endosphere, rhizoplane, and rhizosphere microbial  
423 samples with a series of sample cleaning processes using ultrasonic devices [123]. Fourth,  
424 although this study targeted fungi associated with roots, our methods can be easily extended  
425 to network analyses involving other groups of microbes. By simultaneously analyzing the  
426 prokaryote 16S rRNA region [123-125] with the fungal ITS region, we can examine how  
427 bacteria, archaea, and fungi are involved in below-ground webs of symbioses. Fifth, not only  
428 plant–microbe associations but also microbe–microbe interactions can be estimated with  
429 network analytical frameworks. Various statistical pipelines have been proposed to infer how  
430 microbes interact with each other in facilitative or competitive ways within host  
431 macroorganisms [37, 126, 127]. Overall, those directions of analytical extensions will  
432 enhance our understanding of plant microbiome dynamics in nature.

433

## 434 **Conclusions**

435 By compiling datasets of below-ground plant–fungus associations in temperate and  
436 subtropical forest ecosystems, we explored metacommunity-hub fungi, which were  
437 characterized by broad geographic and host ranges. Such metacommunity-scale analyses are  
438 expected to provide bird’s-eye views of complex plant–microbe associations, highlighting  
439 plant-growth-promoting microbes that can be applied to diverse plant taxa in various  
440 environments. Given that endophytic fungi promoting the growth and pathogen resistance of  
441 host plants can be isolated from forest soil (e.g., *Cladophialophora chaetospora* [99]), the list  
442 of metacommunity-hub endophytic fungi featured in this study itself may include prospective  
443 species to be used in agriculture. By extending the targets of such network analyses to diverse  
444 types of plant-associated microbes (e.g., phyllosphere fungi and bacteria [75, 124, 128]) in

445 various climatic/biogeographic regions, a solid basis for managing plant microbiomes will be  
446 developed.

447

#### 448 **Abbreviations**

449 DDBJ: DNA Data Bank of Japan; ITS: internal transcribed spacer; OTU: Operational  
450 taxonomic unit; PERMANOVA: permutational analysis of variance; PERMDISP:  
451 permutational analysis for the multivariate homogeneity of dispersions; rRNA: ribosomal  
452 ribonucleic acid.

453

#### 454 **Acknowledgements**

455 We thank Teshio Experimental Forest (Hokkaido University), Tomakomai Experimental  
456 Forest (Hokkaido University), Sugadaira Research Station (Tsukuba University), Yona Field  
457 (Ryukyu University), Tropical Biosphere Research Center (Ryukyu University), and Forestry  
458 Agency of Japan for the permission of fieldwork.

459

#### 460 **Funding**

461 This work was financially supported by JSPS KAKENHI Grant (26711026), JST PRESTO  
462 (JPMJPR16Q6), and the Funding Program for Next Generation World-Leading Researchers  
463 of Cabinet Office, the Government of Japan (GS014) to HT.

464

#### 465 **Availability of data and materials**

466 The Illumina sequencing data were deposited to DNA Data Bank of Japan (DDBJ Sequence  
467 Read Archive: DRA006339). The raw data of fungal community structure and the fungal  
468 community matrices analyzed are available with the source study [52] and Additional files  
469 1-3, respectively.

470

#### 471 **Authors' contributions**

472 HT designed the work. HT, AST, and HS conducted fieldwork. HT performed the molecular  
473 experiments. HT wrote the manuscript with AST and HS.

474

475 **Competing interests**

476 The authors declare that they have no competing interests.

477

478 **Consent for publication**

479 Not applicable

480

481 **Ethics approval and consent to participate**

482 Not applicable

483

484 **Additional files**

485 **Additional file 1: Data S1.** Sample-level matrices of the eight forests examined.

486 **Additional file 2: Data S2.** Species-level matrices of plant–fungus associations.

487 **Additional file 3: Data S3.** Information of 8080 fungal OTUs analyzed.

488 **Additional file 4: Figure S1.** Number of sequencing reads, interaction specificity, and local  
489 betweenness.

490 **Additional file 5: Figure S2.** Structure of plant–fungus networks in each local forest.

491 **Additional file 6: Figure S3.** Locality information within the full metacommunity-scale  
492 network.

493 **Additional file 7: Figure S4.** Metacommunity-scale network of cool-temperate forests.

494 **Additional file 8: Figure S5.** Metacommunity-scale network of warm-temperate and  
495 subtropical forests.

496 **Additional file 9: Table S1.** Top-10 list of non-Glomeromycota OTUs with highest  
497 betweenness within the subtropical metacommunity network.

498

## 499 **References**

- 500 1. Peay KG, Kennedy PG, Talbot JM: Dimensions of biodiversity in the Earth  
501 mycobiome. *Nat. Rev. Microbiol.* 2016;14:434-447.
- 502 2. van der Heijden MG, Bardgett RD, van Straalen NM: The unseen majority: soil  
503 microbes as drivers of plant diversity and productivity in terrestrial ecosystems. *Ecol.*  
504 *Lett.* 2008;11:296-310.
- 505 3. van der Heijden MG, Klironomos JN, Ursic M, Moutoglis P, Streitwolf-Engel R,  
506 Boller T et al: Mycorrhizal fungal diversity determines plant biodiversity, ecosystem  
507 variability and productivity. *Nature* 1998;396:69-72.
- 508 4. Wardle DA, Bardgett RD, Klironomos JN, Setälä H, van der Putten WH, Wall DH:  
509 Ecological linkages between aboveground and belowground biota. *Science*  
510 2004;304:1629-1633.
- 511 5. Nara K: Ectomycorrhizal networks and seedling establishment during early primary  
512 succession. *New Phytol.* 2006;169:169-178.
- 513 6. Finlay R, Read D: The structure and function of the vegetative mycelium of  
514 ectomycorrhizal plants. II. The uptake and distribution of phosphorus by mycelial  
515 strands interconnecting host plants. *New Phytol.* 1986;103:157-165.
- 516 7. Klironomos JN, McCune J, Hart M, Neville J: The influence of arbuscular  
517 mycorrhizae on the relationship between plant diversity and productivity. *Ecol. Lett.*  
518 2000;3:137-141.
- 519 8. Högberg MN, Högberg P: Extramatrical ectomycorrhizal mycelium contributes  
520 one-third of microbial biomass and produces, together with associated roots, half the

- 521 dissolved organic carbon in a forest soil. *New Phytol.* 2002;154:791-795.
- 522 9. Högberg P, Nordgren A, Buchmann N, Taylor AF, Ekblad A, Högberg MN et al:  
523 Large-scale forest girdling shows that current photosynthesis drives soil respiration.  
524 *Nature* 2001;411:789-792.
- 525 10. Almario J, Jeena G, Wunder J, Langen G, Zuccaro A, Coupland G et al:  
526 Root-associated fungal microbiota of nonmycorrhizal *Arabidopsis thaliana* and its  
527 contribution to plant phosphorus nutrition. *Proc. Natl. Acad. Sci. USA.*  
528 2017;114:E9403–E9412.
- 529 11. Hiruma K, Gerlach N, Sacristán S, Nakano RT, Hacquard S, Kracher B et al: Root  
530 endophyte *Colletotrichum tofieldiae* confers plant fitness benefits that are phosphate  
531 status dependent. *Cell* 2016;165:464-474.
- 532 12. Hashiba T, Narisawa K: The development and endophytic nature of the fungus  
533 *Heteroconium chaetospora*. *FEMS Microbiol. Lett.* 2005;252:191-196.
- 534 13. Addy H, Piercey M, Currah R: Microfungal endophytes in roots. *Can. J. Bot.*  
535 2005;83:1-13.
- 536 14. Jumpponen A: Dark septate endophytes-are they mycorrhizal? *Mycorrhiza*  
537 2001;11:207-211.
- 538 15. Newsham KK: A meta-analysis of plant responses to dark septate root endophytes.  
539 *New Phytol.* 2011;190:783-793.
- 540 16. Narisawa K, Tokumasu S, Hashiba T: Suppression of clubroot formation in Chinese  
541 cabbage by the root endophytic fungus, *Heteroconium chaetospora*. *Plant Pathol.*  
542 1998;47:206-210.
- 543 17. Calvo P, Nelson L, Kloepper JW: Agricultural uses of plant biostimulants. *Plant Soil*  
544 2014;383:3-41.
- 545 18. Porras-Alfaro A, Bayman P: Hidden fungi, emergent properties: endophytes and  
546 microbiomes. *Ann. Rev. Phytopathol.* 2011;49:291-315.
- 547 19. Mandyam K, Jumpponen A: Seeking the elusive function of the root-colonising dark  
548 septate endophytic fungi. *Studies Mycol.* 2005;53:173-189.

- 549 20. Fuchs B, Haselwandter K: Red list plants: colonization by arbuscular mycorrhizal  
550 fungi and dark septate endophytes. *Mycorrhiza* 2004;14:277-281.
- 551 21. Tedersoo L, Bahram M, Põlme S, Kõljalg U, Yorou NS, Wijesundera R et al: Global  
552 diversity and geography of soil fungi. *Science* 2014;346:1256688.
- 553 22. Buée M, Reich M, Murat C, Morin E, Nilsson R, Uroz S et al: 454 Pyrosequencing  
554 analyses of forest soils reveal an unexpectedly high fungal diversity. *New Phytol.*  
555 2009;184:449-456.
- 556 23. Öpik M, Vanatoa A, Vanatoa E, Moora M, Davison J, Kalwij J et al: The online  
557 database MaarjAM reveals global and ecosystemic distribution patterns in arbuscular  
558 mycorrhizal fungi (Glomeromycota). *New Phytol.* 2010;188:223-241.
- 559 24. Toju H, Guimarães PR, Jr, Olesen JM, Thompson JN: Assembly of complex plant–  
560 fungus networks. *Nat. Commun.* 2014;5:5273.
- 561 25. Toju H, Guimarães PR, Jr, Olesen JM, Thompson JN: Below-ground plant–fungus  
562 network topology is not congruent with above-ground plant–animal network topology.  
563 *Sci. Adv.* 2015;1:e1500291.
- 564 26. Kadowaki K, Yamamoto S, Sato H, Tanabe AS, Hidaka A, Toju H: Plant–soil  
565 feedbacks between arbuscular- and ecto-mycorrhizal communities. *bioRxiv*  
566 2017:<https://doi.org/10.1101/228387>
- 567 27. Schlaeppi K, Bulgarelli D: The plant microbiome at work. *Mol. Plant-Microbe Int.*  
568 2015;28:212-217.
- 569 28. Berendsen RL, Pieterse CM, Bakker PA: The rhizosphere microbiome and plant  
570 health. *Trends Plant Sci.* 2012;17:478-486.
- 571 29. Busby PE, Soman C, Wagner MR, Friesen ML, Kremer J, Bennett A et al: Research  
572 priorities for harnessing plant microbiomes in sustainable agriculture. *PLOS Biol.*  
573 2017;15:e2001793.
- 574 30. Albert R, Jeong H, Barabási AL: Error and attack tolerance of complex networks.  
575 *Nature* 2000;406:378-382.
- 576 31. Newman MEJ: *Networks: an introduction*. Oxford: Oxford University Press; 2010.

- 577 32. Toju H, Tanabe A, Ishii H: Ericaceous plant–fungus network in a harsh alpine–  
578 subalpine environment. *Mol. Ecol.* 2016;25:3242-3257.
- 579 33. Bennett AE, Daniell TJ, Öpik M, Davison J, Moora M, Zobel M et al: Arbuscular  
580 mycorrhizal fungal networks vary throughout the growing season and between  
581 successional stages. *PLoS One* 2013;8:e83241.
- 582 34. Bahram M, Harend H, Tedersoo L: Network perspectives of ectomycorrhizal  
583 associations. *Fungal Ecol.* 2014;7:70-77.
- 584 35. Toju H, Yamamichi M, Guimarães Jr. PR, Olesen J, Mougi A, Yoshida T et al:  
585 Species-rich networks and eco-evolutionary synthesis at the metacommunity level.  
586 *Nat. Ecol. Evol.* 2017;1.
- 587 36. Agler MT, Ruhe J, Kroll S, Morhenn C, Kim S-T, Weigel D et al: Microbial hub taxa  
588 link host and abiotic factors to plant microbiome variation. *PLOS Biol.*  
589 2016;14:e1002352.
- 590 37. Toju H, Yamamoto S, Tanabe AS, Hayakawa T, Ishii HS: Network modules and hubs  
591 in plant-root fungal biome. *J. R. Soc. Interface* 2016;13:20151097.
- 592 38. Smith SE, Read DJ: *Mycorrhizal symbiosis*. New York: Academic press; 2008.
- 593 39. Dickie IA, Koide RT, Fayish AC: Vesicular-arbuscular mycorrhizal infection of  
594 *Quercus rubra* seedlings. *New Phytol.* 2001;151:257-264.
- 595 40. Plattner I, Hall I: Parasitism of non-host plants by the mycorrhizal fungus *Tuber*  
596 *melanosporum*. *Mycol. Res.* 1995;99:1367-1370.
- 597 41. Hallenberg N, Kuffer N: Long - distance spore dispersal in wood - inhabiting  
598 basidiomycetes. *Nordic J. Bot.* 2001;21:431-436.
- 599 42. Nagarajan S, Singh D: Long-distance dispersion of rust pathogens. *Ann. Rev.*  
600 *Phytopathol.* 1990;28:139-153.
- 601 43. Brown JK, Hovmøller MS: Aerial dispersal of pathogens on the global and continental  
602 scales and its impact on plant disease. *Science* 2002;297:537-541.
- 603 44. Hovmøller M, Justesen A, Brown J: Clonality and long - distance migration of  
604 *Puccinia striiformis* f. sp. tritici in north - west Europe. *Plant Pathol.* 2002;51:24-32.

- 605 45. Jousimo J, Tack AJ, Ovaskainen O, Mononen T, Susi H, Tollenaere C et al:  
606 Ecological and evolutionary effects of fragmentation on infectious disease dynamics.  
607 Science 2014;344:1289-1293.
- 608 46. Parker MA: Mutualism in metapopulations of legumes and rhizobia. Am. Nat.  
609 1999;153:S48-S60.
- 610 47. Thrall PH, Burdon JJ: Evolution of virulence in a plant host-pathogen metapopulation.  
611 Science 2003;299:1735-1737.
- 612 48. Lekberg Y, Koide RT, Rohr JR, ALDRICH - WOLFE L, Morton JB: Role of niche  
613 restrictions and dispersal in the composition of arbuscular mycorrhizal fungal  
614 communities. J. Ecol. 2007;95:95-105.
- 615 49. Peay KG, Schubert MG, Nguyen NH, Bruns TD: Measuring ectomycorrhizal fungal  
616 dispersal: macroecological patterns driven by microscopic propagules. Mol. Ecol.  
617 2012;21:4122-4136.
- 618 50. Gouhier TC, Guichard F, Gonzalez A: Synchrony and stability of food webs in  
619 metacommunities. Am. Nat. 2010;175:E16-E34.
- 620 51. Miller R, Jastrow J: The application of VA mycorrhizae to ecosystem restoration and  
621 reclamation. New York: Springer; 1992.
- 622 52. Toju H, Sato H, Yamamoto S, Tanabe AS: Structural diversity across arbuscular  
623 mycorrhizal, ectomycorrhizal, and endophytic plant–fungus networks. bioRxiv  
624 2018:<https://doi.org/10.1101/269563>
- 625 53. Caruso T, Rillig MC, Garlaschelli D: On the application of network theory to  
626 arbuscular mycorrhizal fungi–plant interactions: the importance of basic assumptions.  
627 New Phytol. 2012;194:891-894.
- 628 54. Thompson JN: The geographic mosaic of coevolution. Chicago: University of  
629 Chicago Press; 2005.
- 630 55. Toju H, Tanabe AS, Yamamoto S, Sato H: High-coverage ITS primers for the  
631 DNA-based identification of ascomycetes and basidiomycetes in environmental  
632 samples. PLOS ONE 2012;7:e40863.
- 633 56. Smith DP, Peay KG: Sequence depth, not PCR replication, improves ecological



- 634 inference from next generation DNA sequencing. PLOS ONE 2014;9:e90234.
- 635 57. O'Brien HE, Parrent JL, Jackson JA, Moncalvo J-M, Vilgalys R: Fungal community  
636 analysis by large-scale sequencing of environmental samples. Appl. Env. Microbiol.  
637 2005;71:5544-5550.
- 638 58. Kõljalg U, Nilsson RH, Abarenkov K, Tedersoo L, Taylor AF, Bahram M et al:  
639 Towards a unified paradigm for sequence-based identification of fungi. Mol. Ecol.  
640 2013;22:5271-5277.
- 641 59. Thiéry O, Vasar M, Jairus T, Davison J, Roux C, Kivistik PA et al: Sequence variation  
642 in nuclear ribosomal small subunit, internal transcribed spacer and large subunit  
643 regions of *Rhizophagus irregularis* and *Gigaspora margarita* is high and isolate-  
644 dependent. Mol. Ecol. 2016;25:2816-2832.
- 645 60. Tanabe AS: Claident v0.2.2016.07.05, a software distributed by author at  
646 <http://www.fifthdimension.jp/>. 2016.
- 647 61. Tanabe AS, Toju H: Two new computational methods for universal DNA barcoding: a  
648 benchmark using barcode sequences of bacteria, archaea, animals, fungi, and land  
649 plants. PLOS ONE 2013;8:e76910.
- 650 62. Huson DH, Auch AF, Qi J, Schuster SC: MEGAN analysis of metagenomic data.  
651 Genome Res. 2007;17:377-386.
- 652 63. Nguyen NH, Song Z, Bates ST, Branco S, Tedersoo L, Menke J et al: FUNGuild: an  
653 open annotation tool for parsing fungal community datasets by ecological guild.  
654 Fungal Ecol. 2016;20:241-248.
- 655 64. Anderson MJ: A new method for non-parametric multivariate analysis of variance.  
656 Austral Ecol. 2001;26:32-46.
- 657 65. Anderson MJ: Distance-based tests for homogeneity of multivariate dispersions.  
658 Biometrics 2006;62:245-253.
- 659 66. Oksanen J, Blanchet FG, Kindt R, Legendre P, Minchin PR, O'Hara RB et al: Vegan:  
660 community ecology package. R package version 2.0-3 available at  
661 <http://CRAN.R-project.org/package=vegan>. 2012;10:2008.
- 662 67. R-Core-Team: R 3.4.1: A language and environment for statistical computing

- 663 available at <http://www.R-project.org/>. In. Vienna, Austri: R Foundation for  
664 Statistical Computing; 2015.
- 665 68. Chase JM, Kraft NJ, Smith KG, Vellend M, Inouye BD: Using null models to  
666 disentangle variation in community dissimilarity from variation in  $\alpha$ -diversity.  
667 *Ecosphere* 2011;2:1-11.
- 668 69. Bastian M, Heymann S, Jacomy M: Gephi: an open source software for exploring and  
669 manipulating networks. *Proceedings of the 3rd International AAAI Conference on*  
670 *Weblogs and Social Media* 2009;8:361-362.
- 671 70. Jacomy M, Heymann S, Venturini T, Bastian M: ForceAtlas2, a continuous graph  
672 layout algorithm for handy network visualization designed for the Gephi Software.  
673 *PLOS ONE* 2011;96:e98679.
- 674 71. Blüthgen N, Menzel F, Blüthgen N: Measuring specialization in species interaction  
675 networks. *BMC Ecol.* 2006;6:9.
- 676 72. Freeman LC: A set of measures of centrality based on betweenness. *Sociometry*  
677 1977;40:35-41.
- 678 73. Tedersoo L, Pärtel K, Jairus T, Gates G, Põldmaa K, Tamm H: Ascomycetes  
679 associated with ectomycorrhizas: molecular diversity and ecology with particular  
680 reference to the Helotiales. *Env. Microbiol.* 2009;11:3166-3178.
- 681 74. Rossman AY, Farr DF, Castlebury LA: A review of the phylogeny and biology of the  
682 *Diaporthales*. *Mycoscience* 2007;48:135-144.
- 683 75. Sieber TN: Endophytic fungi in forest trees: are they mutualists? *Fungal Biol. Rev.*  
684 2007;21:75-89.
- 685 76. Liu X-Z, Wang Q-M, Göker M, Groenewald M, Kachalkin A, Lumbsch HT et al:  
686 Towards an integrated phylogenetic classification of the Tremellomycetes. *Studies*  
687 *Mycol.* 2015;81:85-147.
- 688 77. Watanabe T: Pictorial atlas of soil and seed fungi: morphologies of cultured fungi and  
689 key to species. Boca Raton: CRC press; 2010.
- 690 78. Zhang H, Wu X, Li G, Qin P: Interactions between arbuscular mycorrhizal fungi and  
691 phosphate-solubilizing fungus (*Mortierella* sp.) and their effects on *Kosteletzkya*

- 692 virginica growth and enzyme activities of rhizosphere and bulk soils at different  
693 salinities. Biol. Fertil. Soils 2011;47:543.
- 694 79. Eroshin V, Dedyukhina E: Effect of lipids from *Mortierella hygrophila* on plant  
695 resistance to phytopathogens. World J. Microbiol. Biotechnol. 2002;18:165-167.
- 696 80. Melo IS, Santos SN, Rosa LH, Parma MM, Silva LJ, Queiroz SC et al: Isolation and  
697 biological activities of an endophytic *Mortierella alpina* strain from the Antarctic  
698 moss *Schistidium antarctici*. Extremophiles 2014;18:15-23.
- 699 81. Papavizas G: *Trichoderma* and *Gliocladium*: biology, ecology, and potential for  
700 biocontrol. Ann. Rev. Phytopathol. 1985;23:23-54.
- 701 82. Datnoff L, Nemeč S, Pernezny K: Biological control of *Fusarium* crown and root rot  
702 of tomato in Florida using *Trichoderma harzianum* and *Glomus intraradices*. Biologi.  
703 Control 1995;5:427-431.
- 704 83. Bailey B, Bae H, Strem M, Crozier J, Thomas S, Samuels G et al: Antibiosis,  
705 mycoparasitism, and colonization success for endophytic *Trichoderma* isolates with  
706 biological control potential in *Theobroma cacao*. Biologi. Control 2008;46:24-35.
- 707 84. Bae H, Roberts DP, Lim H-S, Strem MD, Park S-C, Ryu C-M et al: Endophytic  
708 *Trichoderma* isolates from tropical environments delay disease onset and induce  
709 resistance against *Phytophthora capsici* in hot pepper using multiple mechanisms. Mol.  
710 Plant-Microbe Int. 2011;24:336-351.
- 711 85. AL-Shammari TA, Bahkali AH, Elgorban AM, El-Kahky MT, Al-Sum BA: The use  
712 of *Trichoderma longibrachiatum* and *Mortierella alpina* against root-knot nematode,  
713 *Meloidogyne javanica* on tomato. J. Pure Appl. Microbiol. 2013;7:199-207.
- 714 86. Ming Q, Su C, Zheng C, Jia M, Zhang Q, Zhang H et al: Elicitors from the endophytic  
715 fungus *Trichoderma atroviride* promote *Salvia miltiorrhiza* hairy root growth and  
716 tanshinone biosynthesis. J. Exp. Bot. 2013;64:5687-5694.
- 717 87. Mašínová T, Bahnmann BD, Větrovský T, Tomšovský M, Merunková K, Baldrian P:  
718 Drivers of yeast community composition in the litter and soil of a temperate forest.  
719 FEMS Microbiol. Ecol. 2016;93:fiw223.
- 720 88. Nutaratat P, Srisuk N, Arunrattiyakorn P, Limtong S: Plant growth-promoting traits of

- 721 epiphytic and endophytic yeasts isolated from rice and sugar cane leaves in Thailand.  
722 Fungal Biol. 2014;118:683-694.
- 723 89. Renker C, Blanke V, Börstler B, Heinrichs J, Buscot F: Diversity of *Cryptococcus* and  
724 *Dioszegia* yeasts (Basidiomycota) inhabiting arbuscular mycorrhizal roots or spores.  
725 FEMS Yeast Res. 2004;4:597-603.
- 726 90. Gai CS, Lacava PT, Maccheroni W, Glienke C, Araújo WL, Miller TA et al: Diversity  
727 of endophytic yeasts from sweet orange and their localization by scanning electron  
728 microscopy. J. Basic Microbiol. 2009;49:441-451.
- 729 91. Cloete KJ, Valentine AJ, Stander MA, Blomerus LM, Botha A: Evidence of symbiosis  
730 between the soil yeast *Cryptococcus laurentii* and a sclerophyllous medicinal shrub,  
731 *Agathosma betulina* (Berg.) Pillans. Microb. Ecol. 2009;57:624-632.
- 732 92. Couture M, Fortin J, Dalpe Y: *Oidiodendron griseum* Robak: An endophyte of ericoid  
733 mycorrhiza in *Vaccinium* spp. New Phytol. 1983;95:375-380.
- 734 93. Vohník M, Albrechtová J, Vosátka M: The inoculation with *Oidiodendron maius* and  
735 *Phialocephala fortinii* alters phosphorus and nitrogen uptake, foliar C: N ratio and root  
736 biomass distribution in *Rhododendron* cv. Azurro. Symbiosis 2005;40:87-96.
- 737 94. Rice AV, Currah RS: *Oidiodendron*: A survey of the named species and related  
738 anamorphs of *Myxotrichum*. Studies Mycol. 2005;53:83-120.
- 739 95. Lombard L, Van Der Merwe NA, Groenewald JZ, Crous PW: Lineages in  
740 Nectriaceae: re-evaluating the generic status of *Ilyonectria* and allied genera.  
741 Phytopathol. Mediterr. 2014;53:515-532.
- 742 96. Whitelaw - Weckert M, Rahman L, Appleby L, Hall A, Clark A, Waite H et al: Co -  
743 infection by Botryosphaeriaceae and *Ilyonectria* spp. fungi during propagation causes  
744 decline of young grafted grapevines. Plant Pathol. 2013;62:1226-1237.
- 745 97. Vitale A, Aiello D, Guarnaccia V, Perrone G, Stea G, Polizzi G: First report of root rot  
746 caused by *Ilyonectria* (= *Neonectria*) macrodidyma on avocado (*Persea americana*) in  
747 Italy. J. Phytopathol. 2012;160:156-159.
- 748 98. Usuki F, Narisawa K: Formation of structures resembling ericoid mycorrhizas by the  
749 root endophytic fungus *Heteroconium chaetospira* within roots of *Rhododendron*

- 750            *obtusum* var. *kaempferi*. Mycorrhiza 2005;15:61-64.
- 751    99.    Narisawa K, Hambleton S, Currah RS: *Heteroconium chaetospora*, a dark septate root  
752            endophyte allied to the Herpotrichiellaceae (Chaetothyriales) obtained from some  
753            forest soil samples in Canada using bait plants. Mycoscience 2007;48:274-281.
- 754    100.    Vohník M, Albrechtová J: The co-occurrence and morphological continuum between  
755            ericoid mycorrhiza and dark septate endophytes in roots of six European  
756            *Rhododendron* species. Folia Geobotanica 2011;46:373-386.
- 757    101.    Jumpponen A, Trappe JM: Dark septate endophytes: a review of facultative biotrophic  
758            root-colonizing fungi. New Phytol. 1998;140:295-310.
- 759    102.    Usuki F, Narisawa K: A mutualistic symbiosis between a dark septate endophytic  
760            fungus, *Heteroconium chaetospora*, and a nonmycorrhizal plant, Chinese cabbage.  
761            Mycologia 2007;99:175-184.
- 762    103.    Wang W, Tsuneda A, Gibas CF, Currah RS: *Cryptosporiopsis* species isolated from  
763            the roots of aspen in central Alberta: identification, morphology, and interactions with  
764            the host, in vitro Botany 2007;85:1214-1226.
- 765    104.    Kowalski T, Bartnik C: *Cryptosporiopsis radiciala* sp. nov. from roots of *Quercus*  
766            *robur*. Mycol. Res. 1995;99:663-666.
- 767    105.    Sigler L, Allan T, Lim SR, Berch S, Berbee M: Two new *Cryptosporiopsis* species  
768            from roots of ericaceous hosts in western North America. Studies Mycol.  
769            2005;53:53-62.
- 770    106.    Schulz B, Sucker J, Aust H, Krohn K, Ludewig K, Jones P et al: Biologically active  
771            secondary metabolites of endophytic *Pezicula* species. Mycol. Res.  
772            1995;99:1007-1015.
- 773    107.    Strobel GA, Miller RV, Martinez-Miller C, Condrón MM, Teplow DB, Hess W:  
774            Cryptocandin, a potent antimycotic from the endophytic fungus *Cryptosporiopsis* cf.  
775            *quercina*. Microbiology 1999;145:1919-1926.
- 776    108.    Talbot JM, Bruns TD, Taylor JW, Smith DP, Branco S, Glassman SI et al: Endemism  
777            and functional convergence across the North American soil mycobiome. Proc. Natl.  
778            Acad. Sci. USA. 2014;111:6341-6346.

- 779 109. Martiny JBH, Bohannan BJ, Brown JH, Colwell RK, Fuhrman JA, Green JL et al:  
780 Microbial biogeography: putting microorganisms on the map. *Nat. Rev. Microbiol.*  
781 2006;4:102-112.
- 782 110. De Wit R, Bouvier T: ‘Everything is everywhere, but, the environment selects’; what  
783 did Baas Becking and Beijerinck really say? *Env. Microbiol.* 2006;8:755-758.
- 784 111. Rooney N, McCann K, Gellner G, Moore JC: Structural asymmetry and the stability  
785 of diverse food webs. *Nature* 2006;442:265-269.
- 786 112. Ellison AM, Bank MS, Clinton BD, Colburn EA, Elliott K, Ford CR et al: Loss of  
787 foundation species: consequences for the structure and dynamics of forested  
788 ecosystems. *Front. Ecol. Env.* 2005;3:479-486.
- 789 113. Paine RT: Food web complexity and species diversity. *Am. Nat.* 1966;100:65-75.
- 790 114. Waller F, Achatz B, Baltruschat H, Fodor J, Becker K, Fischer M et al: The  
791 endophytic fungus *Piriformospora indica* reprograms barley to salt-stress tolerance,  
792 disease resistance, and higher yield. *Proc. Natl. Acad. Sci. USA.*  
793 2005;102:13386-13391.
- 794 115. Castro-Sowinski S, Herschkovitz Y, Okon Y, Jurkevitch E: Effects of inoculation with  
795 plant growth-promoting rhizobacteria on resident rhizosphere microorganisms. *FEMS*  
796 *Microbiol. Lett.* 2007;276:1-11.
- 797 116. Streeter JG: Failure of inoculant rhizobia to overcome the dominance of indigenous  
798 strains for nodule formation. *Can. J. Bot.* 1994;40:513-522.
- 799 117. Hartman K, van der Heijden MG, Roussely-Provent V, Walser J-C, Schlaeppli K:  
800 Deciphering composition and function of the root microbiome of a legume plant.  
801 *Microbiome* 2017;5:2.
- 802 118. Jumpponen A, Trappe JM: Performance of *Pinus contorta* inoculated with two strains  
803 of root endophytic fungus, *Phialocephala fortinii*: effects of synthesis system and  
804 glucose concentration. *Can. J. Bot.* 1998;76:1205-1213.
- 805 119. Callahan BJ, McMurdie PJ, Rosen MJ, Han AW, Johnson AJA, Holmes SP: DADA2:  
806 high-resolution sample inference from Illumina amplicon data. *Nat. Methods*  
807 2016;13:581-583.

- 808 120. Langille MG, Zaneveld J, Caporaso JG, McDonald D, Knights D, Reyes JA et al:  
809 Predictive functional profiling of microbial communities using 16S rRNA marker  
810 gene sequences. *Nat. Biotech.* 2013;31:814-821.
- 811 121. Vohník M, Mrnka L, Lukešová T, Bruzone MC, Kohout P, Fehrer J: The cultivable  
812 endophytic community of Norway spruce ectomycorrhizas from microhabitats lacking  
813 ericaceous hosts is dominated by ericoid mycorrhizal *Meliniomyces variabilis*. *Fungal*  
814 *Ecol.* 2013;6:281-292.
- 815 122. Richardson AE, Barea J-M, McNeill AM, Prigent-Combaret C: Acquisition of  
816 phosphorus and nitrogen in the rhizosphere and plant growth promotion by  
817 microorganisms. *Plant Soil* 2009;321:305-339.
- 818 123. Lundberg DS, Lebeis SL, Paredes SH, Yourstone S, Gehring J, Malfatti S et al:  
819 Defining the core *Arabidopsis thaliana* root microbiome. *Nature* 2012;488:86-90.
- 820 124. Bai Y, Müller DB, Srinivas G, Garrido-Oter R, Potthoff E, Rott M et al: Functional  
821 overlap of the *Arabidopsis* leaf and root microbiota. *Nature* 2015;528:364-369.
- 822 125. Edwards J, Johnson C, Santos-Medellín C, Lurie E, Podishetty NK, Bhatnagar S et al:  
823 Structure, variation, and assembly of the root-associated microbiomes of rice. *Proc.*  
824 *Natl. Acad. Sci. USA.* 2015;112:E911-E920.
- 825 126. Faust K, Raes J: Microbial interactions: from networks to models. *Nat. Rev. Microbiol.*  
826 2012;10:538-550.
- 827 127. Kurtz ZD, Mueller CL, Miraldi ER, Littman DR, Blaser MJ, Bonneau RA: Sparse and  
828 compositionally robust inference of microbial ecological networks. *PLOS Comp. Biol.*  
829 2015;11:e1004226.
- 830 128. Arnold AE, Mejía LC, Kyllö D, Rojas EI, Maynard Z, Robbins N et al: Fungal  
831 endophytes limit pathogen damage in a tropical tree. *Proc. Natl. Acad. Sci. USA.*  
832 2003;100:15649-15654.  
833

**Table 1** Top-10 list of non-Glomeromycota OTUs with highest betweenness within the metacommunity networks. In each of the three metacommunity-scale networks examined (full, cool-temperate, and warm-temperate/subtropical), fungal OTUs were ranked based on their betweenness centrality scores. As taxonomic information of Glomeromycota OTUs with high betweenness scores was redundant (e.g., *Glomus* spp. or Glomeraceae spp.), the top-10 list of non-Glomeromycota OTUs is shown. Taxonomy information of each OTU was inferred based on the query-centric auto-*k*-nearest-neighbor algorithm of reference database search [60, 61] and subsequent taxonomic assignment with the lowest common ancestor algorithm [62]. The results of the NCBI nucleotide Blast are also shown. For simplicity, the functional groups of fungi inferred with the program FUNGuild [63] were organized into several categories. See Data S3 (Additional file 3) for details of the categories and for full results including Glomeromycota and other fungal OTUs.

| OTU           | Phylum        | Class             | Order            | Family            | Genus                | Category             | NCBI Blast top hit           | Accession | Cover | Identity |
|---------------|---------------|-------------------|------------------|-------------------|----------------------|----------------------|------------------------------|-----------|-------|----------|
| Full (8sites) |               |                   |                  |                   |                      |                      |                              |           |       |          |
| F_0042*       | -             | -                 | Mortierellales   | Mortierellaceae   | <i>Mortierella</i>   | Saprotroph/Endophyte | <i>Mortierella humilis</i>   | KP714537  | 100%  | 100%     |
| F_0381        | Basidiomycota | Tremellomycetes   | Trichosporonales | Trichosporonaceae | <i>Cryptococcus</i>  | Others_Unknown       | <i>Saitozyma podzolica</i> † | KY320605  | 92%   | 99%      |
| F_0079        | Ascomycota    | Sordariomycetes   | Hypocreales      | Nectriaceae       | -                    | Saprotroph/Endophyte | <i>Ilyonectria protearum</i> | NR_152890 | 99%   | 100%     |
| F_0489        | -             | -                 | Mortierellales   | Mortierellaceae   | <i>Mortierella</i>   | Saprotroph/Endophyte | <i>Mortierella</i> sp.       | KM113754  | 100%  | 100%     |
| F_0010        | Ascomycota    | Leotiomycetes     | -                | Myxotrichaceae    | <i>Oidiodendron</i>  | Ericoid_Mycorrhizal  | <i>Oidiodendron maius</i>    | LC206669  | 100%  | 100%     |
| F_0368        | Basidiomycota | Malasseziomycetes | Malasseziales    | Malasseziaceae    | <i>Malassezia</i>    | Others_Unknown       | <i>Malassezia restricta</i>  | KT809059  | 100%  | 100%     |
| F_0623        | -             | -                 | Mortierellales   | Mortierellaceae   | <i>Mortierella</i>   | Saprotroph/Endophyte | <i>Mortierella gamsii</i>    | KY305027  | 100%  | 100%     |
| F_1188        | Basidiomycota | Tremellomycetes   | Trichosporonales | Trichosporonaceae | <i>Cryptococcus</i>  | Others_Unknown       | <i>Saitozyma podzolica</i> † | KY320605  | 92%   | 99%      |
| F_0007        | Ascomycota    | Sordariomycetes   | Diaporthales     | Melanconidaceae   | <i>Melanconiella</i> | Saprotroph/Endophyte | <i>Melanconiella elegans</i> | KJ173701  | 100%  | 85%      |
| F_0485        | Ascomycota    | Sordariomycetes   | Hypocreales      | Hypocreaceae      | <i>Trichoderma</i>   | Saprotroph/Endophyte | <i>Trichoderma</i> sp.       | HG008760  | 100%  | 100%     |



Northern 4 sites (cool-temperate)

|         |            |                 |                 |                     |                         |                      |                                     |           |      |      |
|---------|------------|-----------------|-----------------|---------------------|-------------------------|----------------------|-------------------------------------|-----------|------|------|
| F_0042* | -          | -               | Mortierellales  | Mortierellaceae     | <i>Mortierella</i>      | Saprotroph/Endophyte | <i>Mortierella humilis</i>          | KP714537  | 100% | 100% |
| F_0034* | Ascomycota | Eurotiomycetes  | Chaetothyriales | Herpotrichiellaceae | <i>Cladophialophora</i> | Saprotroph/Endophyte | <i>Cladophialophora chaetospira</i> | KF359558  | 100% | 99%  |
| F_0079* | Ascomycota | Sordariomycetes | Hypocreales     | Nectriaceae         | -                       | Saprotroph/Endophyte | <i>Ilyonectria protearum</i>        | NR_152890 | 99%  | 100% |
| F_0015* | Ascomycota | -               | -               | -                   | -                       | Others_Unknown       | <i>Cadophora orchidicola</i>        | KX611558  | 100% | 99%  |
| F_0202* | Ascomycota | Eurotiomycetes  | Chaetothyriales | Herpotrichiellaceae | <i>Cladophialophora</i> | Saprotroph/Endophyte | <i>Cladophialophora chaetospira</i> | HQ871875  | 100% | 99%  |
| F_0195* | Ascomycota | Eurotiomycetes  | Chaetothyriales | Herpotrichiellaceae | <i>Cladophialophora</i> | Saprotroph/Endophyte | <i>Cladophialophora chaetospira</i> | EU035405  | 100% | 100% |
| F_0181* | Ascomycota | Leotiomycetes   | Helotiales      | Dermateaceae        | <i>Pezizula</i>         | Endophyte            | <i>Pezizula melanigena</i>          | LC206665  | 100% | 99%  |
| F_0010  | Ascomycota | Leotiomycetes   | -               | Myxotrichaceae      | <i>Oidiodendron</i>     | Ericoid_Mycorrhizal  | <i>Oidiodendron maius</i>           | LC206669  | 100% | 100% |
| F_0103* | Ascomycota | Eurotiomycetes  | Chaetothyriales | Herpotrichiellaceae | <i>Cladophialophora</i> | Saprotroph/Endophyte | <i>Cladophialophora chaetospira</i> | EU035403  | 100% | 97%  |
| F_0489* | -          | -               | Mortierellales  | Mortierellaceae     | <i>Mortierella</i>      | Saprotroph/Endophyte | <i>Mortierella</i> sp.              | KM113754  | 100% | 100% |

Southern 4 sites (warm-temperate and subtropical)

|         |               |                 |                  |                     |                      |                      |                               |          |      |      |
|---------|---------------|-----------------|------------------|---------------------|----------------------|----------------------|-------------------------------|----------|------|------|
| F_0381* | Basidiomycota | Tremellomycetes | Trichosporonales | Trichosporonaceae   | <i>Cryptococcus</i>  | Others_Unknown       | <i>Saitozyma podzolica</i> †  | KY320605 | 92%  | 99%  |
| F_0042* | -             | -               | Mortierellales   | Mortierellaceae     | <i>Mortierella</i>   | Saprotroph/Endophyte | <i>Mortierella humilis</i>    | KP714537 | 100% | 100% |
| F_0610* | Ascomycota    | Sordariomycetes | Hypocreales      | Hypocreaceae        | <i>Trichoderma</i>   | Saprotroph/Endophyte | <i>Trichoderma spirale</i>    | KU948158 | 100% | 100% |
| F_1188* | Basidiomycota | Tremellomycetes | Trichosporonales | Trichosporonaceae   | <i>Cryptococcus</i>  | Others_Unknown       | <i>Saitozyma podzolica</i> †  | KY320605 | 92%  | 99%  |
| F_0029  | Ascomycota    | Eurotiomycetes  | Chaetothyriales  | Herpotrichiellaceae | -                    | Others_Unknown       | <i>Cladophialophora</i> sp.   | LC189029 | 100% | 99%  |
| F_0017  | Ascomycota    | -               | -                | -                   | -                    | Others_Unknown       | <i>Scleropezizula</i> sp.     | KT809119 | 100% | 98%  |
| F_0007  | Ascomycota    | Sordariomycetes | Diaporthales     | Melanconidaceae     | <i>Melanconiella</i> | Saprotroph/Endophyte | <i>Melanconiella elegans</i>  | KJ173701 | 100% | 85%  |
| F_0485  | Ascomycota    | Sordariomycetes | Hypocreales      | Hypocreaceae        | <i>Trichoderma</i>   | Saprotroph/Endophyte | <i>Trichoderma</i> sp.        | HG008760 | 100% | 100% |
| F_0112  | Basidiomycota | Agaricomycetes  | Thelephorales    | Thelephoraceae      | <i>Tomentella</i>    | Ectomycorrhizal      | <i>Tomentella stuposa</i>     | KR019860 | 100% | 98%  |
| F_0073  | Ascomycota    | Sordariomycetes | -                | -                   | -                    | Others_Unknown       | <i>Rhexodenticula acaciae</i> | KY173442 | 94%  | 95%  |

\*Fungal OTUs classified as metacommunity hubs (mean local betweenness > 0.5; metacommunity betweenness > 0.5)

†Synonym, *Cryptococcus podzolica*

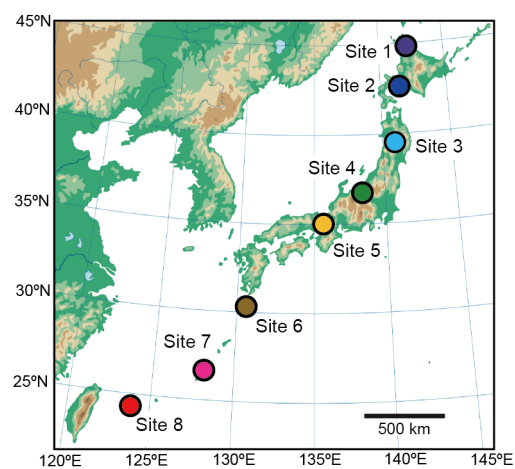

**Fig. 1** Study sites examined in this study. Across the entire range of the Japanese Archipelago, root samples were collected in four cool-temperate forests (sites 1–4), one warm-temperate forest (site 5), and three subtropical forests (sites 6–8).

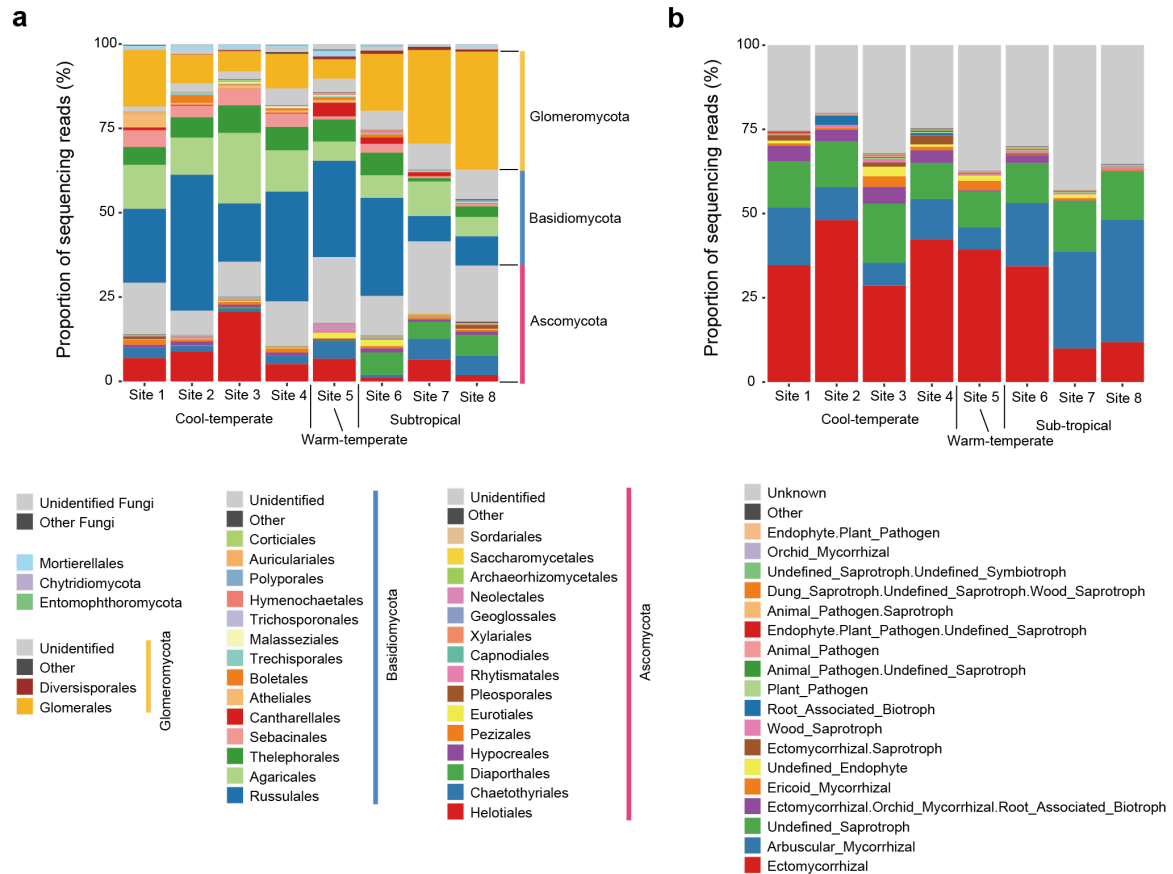

**Fig. 2** Compositions of fungal taxa and functional groups in each forest. **a** Order-level taxonomic composition of fungal OTUs in each locality. The number of fungal OTUs detected is shown in a parenthesis for each forest. **b** Functional-group composition. The fungal functional groups were inferred by the program FUNGuild [63].

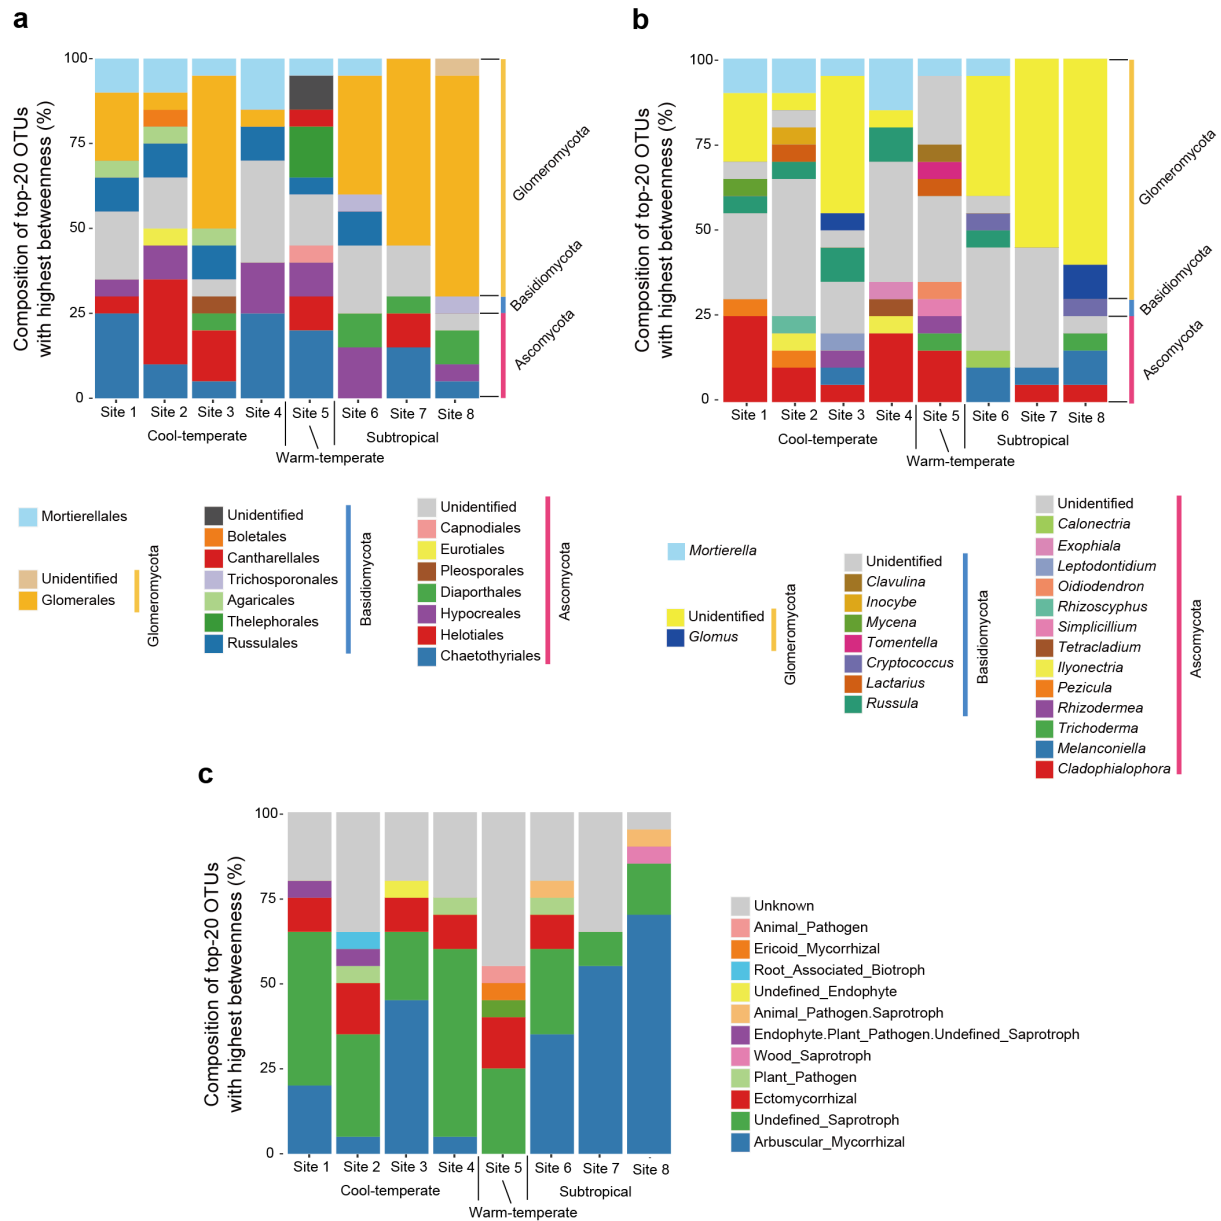

**Fig. 3** Fungal OTUs with highest local betweenness. **a** Order-level taxonomic composition of top-20 OTUs with highest local betweenness in each forest. See Data S3 (Additional file 3) for betweenness scores of all fungal OTUs in respective local forests. **b** Genus-level taxonomic composition of top-20 OTUs with highest local betweenness. **c** Functional-group composition of top-20 OTUs with highest local betweenness.

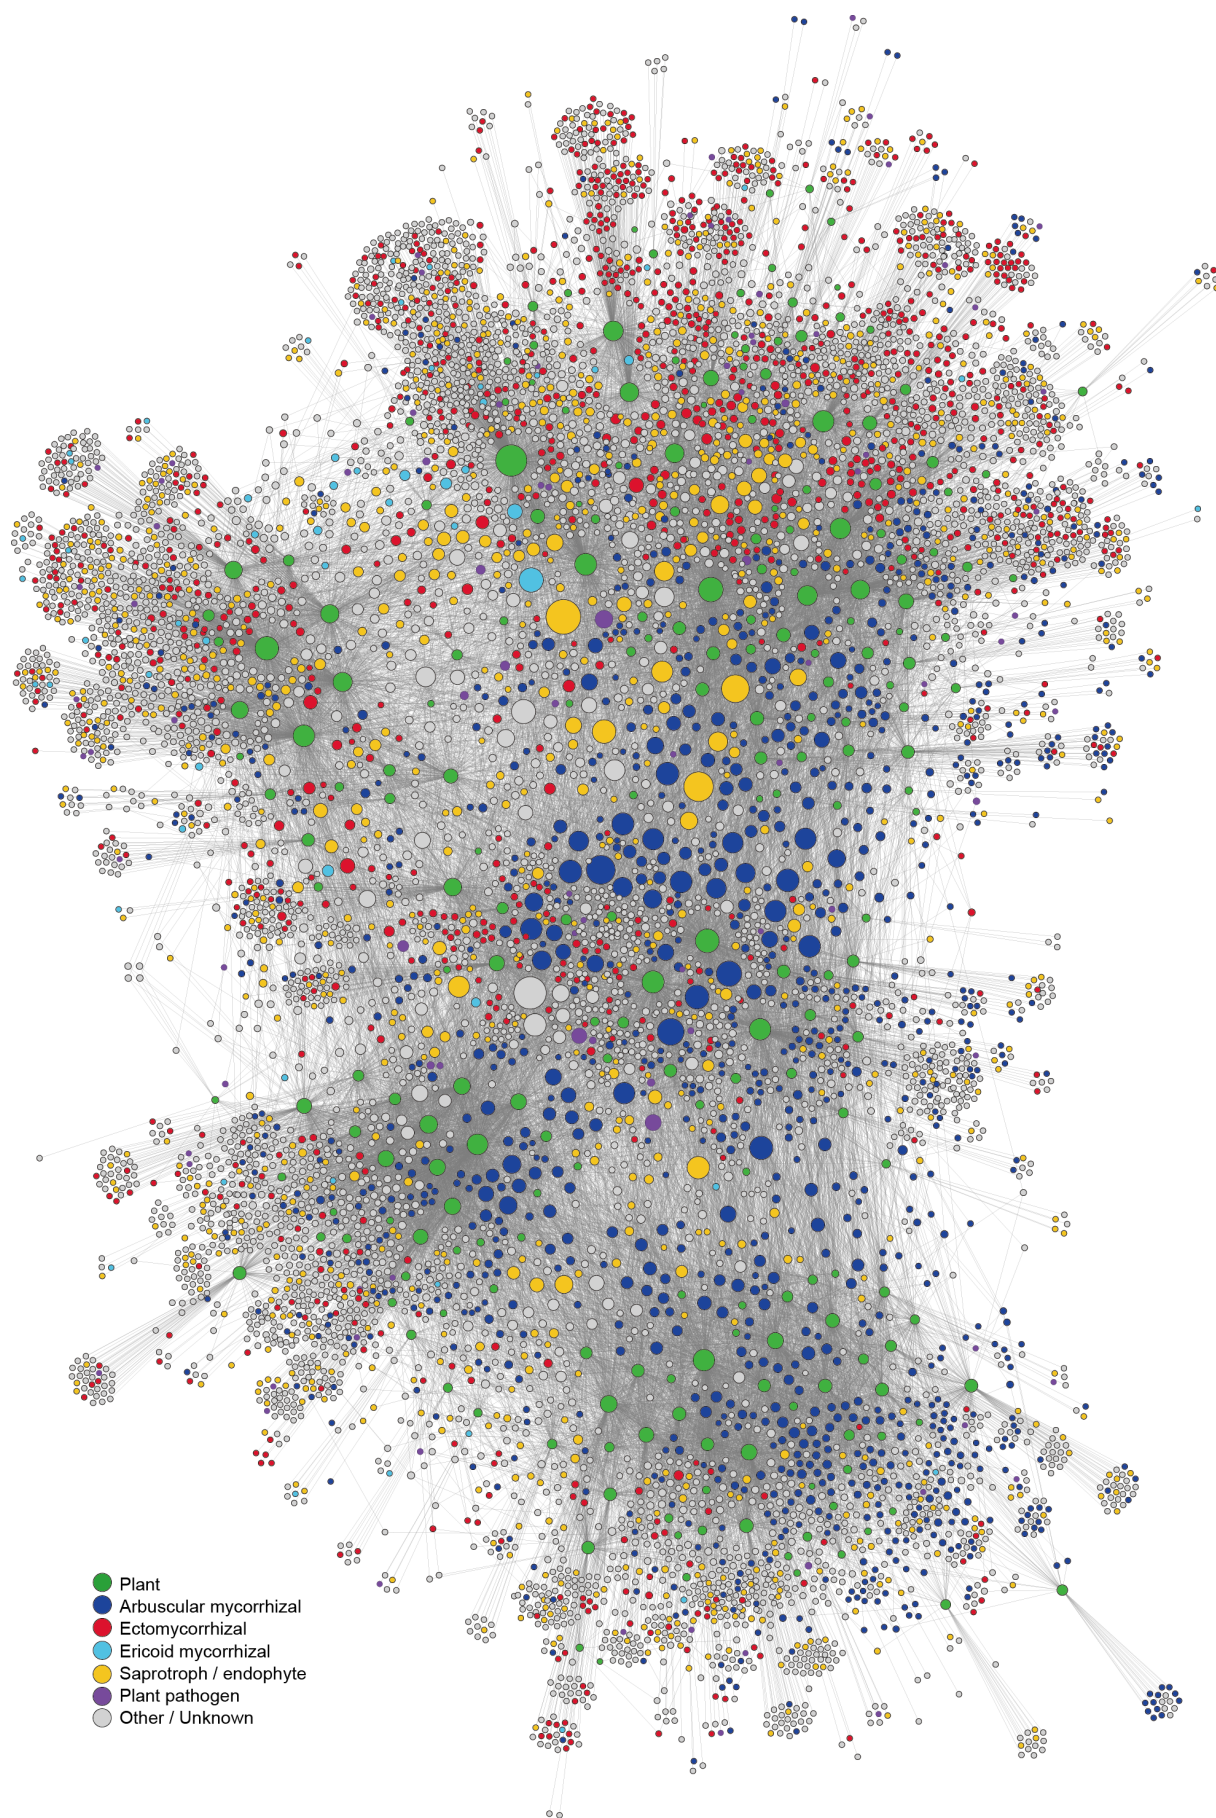

**Fig. 4** Metacommunity-scale network including all the eight local forests. The size of circles roughly represents relative scores of betweenness centrality. The functional groups of fungi inferred with the program FUNGuild [63] were organized into six categories: i.e., arbuscular mycorrhizal (blue), ectomycorrhizal (red), ericoid mycorrhizal (skyblue), saprotrophic/endophytic (yellow), plant pathogenic (purple), and other/unknown fungi (grey) (Additional file 3; Data S3). For plant species/taxa (green), the geographic information of source populations is indicated in Additional file 6 (Figure S3).

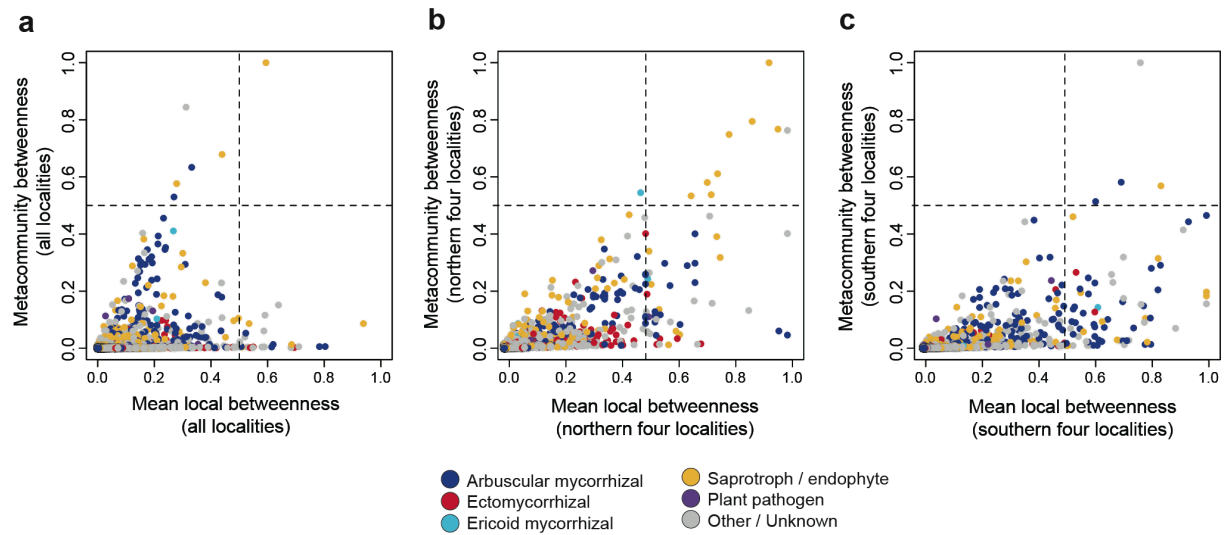

**Fig. 5** Relationship between local- and metacommunity-level betweenness. **a** Full metacommunity. On the horizontal axis, the mean values of betweenness centrality scores across all the eight local forests are shown for respective fungal OTUs. On the vertical axis, the betweenness scores within the metacommunity-scale network consisting of the eight localities (Fig. 4) are shown for respective OTUs. **b** Metacommunity of cool-temperate forests. For the sub-dataset consisting of the four cool-temperate forests (Additional file 7: Figure S4), mean local betweenness and metacommunity betweenness are shown on the horizontal and vertical axes, respectively. **c** Metacommunity of warm-temperate and subtropical forests. For the sub-dataset consisting of the warm-temperate forest and the three subtropical forests (Additional file 8: Figure S5), mean local betweenness and metacommunity betweenness are shown on the horizontal and vertical axes, respectively.
